# Supplementary material for: Adolescents Perceptions and Behaviors Towards Periodic Health Examinations in Riyadh, Saudi Arabia
Source: Research Square preprint supplement (doi:10.21203/rs.3.rs-4664136/v3), 2025-03-31
Supplement: Supplementary file 1 [file ad6f2f4a48984c75af1490eb.docx]

| **Table 1**. Socio-demographic characteristics of participating adolescents in Riyadh | | |
| --- | --- | --- |
| Items | n | % |
| **Gender** |  |  |
| Male | 666 | 55.5 |
| Female | 533 | 44.5 |
| **Age** |  |  |
| 12 | 24 | 2.0 |
| 13 | 158 | 13.2 |
| 14 | 238 | 19.8 |
| 15 | 248 | 20.7 |
| 16 | 250 | 20.9 |
| 17 | 208 | 17.3 |
| 18-20 | 73 | 6.1 |
| **Nationality** |  |  |
| Saudi | 903 | 75.3 |
| Non-Saudi | 296 | 24.7 |
| **Type of school** |  |  |
| Public | 819 | 68.3 |
| Private | 259 | 21.6 |
| International | 121 | 10.1 |
| **Grade** |  |  |
| 2nd intermediate schools | 283 | 23.6 |
| 3rd intermediate schools | 165 | 13.8 |
| 1st secondary schools | 270 | 22.5 |
| 2nd secondary schools | 244 | 20.4 |
| 3rd secondary schools | 237 | 19.8 |
| **Father Education** |  |  |
| University Degree and above | 793 | 66.1 |
| Secondary school and below | 406 | 33.9 |
| **Mother Education** |  |  |
| University Degree and above | 660 | 55 |
| Secondary school and below | 539 | 45 |
| **Health Status** |  |  |
| Healthy | 1052 | 87.7 |
| Chronically-ill | 147 | 12.3 |
| **Accessibility to Healthcare** |  |  |
| I don’t know | 325 | 27.1 |
| Government sector | 242 | 20.2 |
| Public hospitals | 240 | 20 |
| Standard insurance | 172 | 14.3 |
| Private hospitals | 124 | 10.3 |
| VIP Insurance | 96 | 8 |

| **Table 2.** The level of knowledge and awareness of adolescents about the PHEs recommended in Riyadh | | |
| --- | --- | --- |
| Items | n | % |
| **Self-assessment of awareness** |  |  |
| Aware | 846 | 70.6 |
| Not aware | 353 | 29.4 |
| **PHEs definition** |  |  |
| Correct | 611 | 51.0 |
| Incorrect | 286 | 23.8 |
| **PHEs Eligibility** |  |  |
| I don’t know | 302 | 25.2 |
| Healthy individuals | 97 | 8.1 |
| Sick individuals | 140 | 11.7 |
| Both of them | 734 | 61.2 |
| I don’t know | 228 | 19.0 |
| **Recommended PHEs known** |  |  |
| Evaluation of Sun exposure and Vitamin D levels* | 615 | 51.3 |
| Complete Blood Count (CBC) | 557 | 46.5 |
| Blood pressure | 550 | 45.9 |
| Weight, length, and BMI* | 536 | 44.7 |
| Blood Glucose levels | 505 | 42.1 |
| Screening for Depression* | 383 | 31.9 |
| Cholesterol and TAGs levels | 367 | 30.6 |
| Evaluation of Smoking status and cessation* | 340 | 28.4 |
| Thyroid gland | 338 | 28.2 |
| Kidney Functions test | 337 | 28.1 |
| Liver functions test | 298 | 24.9 |
| Evaluation of Oral Hygiene* | 278 | 23.2 |
| Stool and urine analysis | 262 | 21.9 |
| Hepatitis screening | 228 | 19.0 |
| Sexually transmitted diseases* | 209 | 17.4 |
| I don’t know | 293 | 24.4 |
| Others | 38 | 3.2 |
| **Application time** |  |  |
| Correct | 615 | 51.3 |
| Incorrect | 356 | 29.7 |
| I don’t know | 228 | 19.0 |
| **Sources of information** |  |  |
| Internet and social media | 605 | 50.5 |
| Family | 411 | 34.3 |
| I don’t have enough knowledge | 330 | 27.5 |
| School's subjects | 212 | 17.7 |
| Medical team | 212 | 17.7 |
| Friends | 206 | 17.2 |
| TV programs | 139 | 11.6 |
| Other | 38 | 3.2 |
| *: Recommended by Saudi Center for Disease Prevention and Control (Weqaya) ‘National Guideline of Periodic Health Examination’ 2nd Edition (2019) | | |

| **Table 3.** The level of adolescents’ performance of PHEs in Riyadh | | |
| --- | --- | --- |
| **Items** | **n** | **%** |
| **Status of performance** |  |  |
| Didn’t Performed | 631 | 52.6 |
| Performed | 568 | 47.4 |
| *Total =* | 1199 | 100 |
| **Frequency of Performance** | 1199 | 100 |
| Irregularly | 211 | 37.1 |
| Once | 209 | 36.8 |
| Regularly (Yearly, every 6 months) | 148 | 26.1 |
| *Total =* | 568 | 100 |
| **PHEs done** |  |  |
| Evaluation of sun exposure and Vitamin D levels* | 326 | 57.40 |
| Weight, length, and BMI* | 294 | 51.80 |
| Complete Blood Count (CBC) | 285 | 50.20 |
| Blood pressure | 273 | 48.10 |
| Blood Glucose levels | 188 | 33.10 |
| Evaluation of Oral hygiene* | 162 | 28.50 |
| Cholesterol and TAGs levels | 152 | 26.80 |
| Thyroid gland | 148 | 26.10 |
| Stool and urine analysis | 133 | 23.40 |
| Kidney functions tests | 97 | 17.10 |
| Liver functions tests | 80 | 14.10 |
| Screening for Depression* | 61 | 10.70 |
| Evaluation of smoking status and cessation * | 57 | 10.00 |
| Hepatitis screening | 36 | 6.30 |
| Sexually transmitted diseases* | 22 | 3.90 |
| Others | 49 | 8.60 |
| **Location of performance** |  |  |
| Public hospital | 238 | 41.9 |
| Private hospital | 201 | 35.4 |
| Public clinic | 43 | 7.6 |
| Private clinic | 35 | 6.2 |
| Private lab | 29 | 5.1 |
| Others | 22 | 3.9 |
| **Motivators** |  |  |
| General health evaluation | 288 | 50.70 |
| Worrying | 164 | 28.90 |
| Early detection of diseases | 159 | 28.0 |
| Family history | 84 | 14.80 |
| Quit harmful habits | 33 | 5.80 |
| Others | 65 | 11.40 |
| **Recommendation** |  |  |
| Yes | 556 | 97.9 |
| No | 12 | 2.1 |
| *: Recommended by Saudi Center for Disease Prevention and Control (Weqaya) ‘National Guideline of Periodic Health Examination’ 2nd Edition (2019) | | |

| **Table 4:** The association between Socio-demographic variables and the adolescents' level of knowledge using Bi-variate and multivariate logistics regression analysis (n=1199) | | | | | |
| --- | --- | --- | --- | --- | --- |
| **Items** | Level of knowledge | | p-value  (chi-square) | Unadjusted Odds ratios (95% CI’s) | Adjusted Odds ratios  (95% CI’s) |
| Inadequate (<3)  (n=673) | Adequate (≥3)  (n=526) |
| n (%) | n (%) |
| **Gender** |  |  |  |  |  |
| Male | 431 (64.7) | 235 (35.3) | **.001**  **(44.838)** | 2.20(1.75,2.78) | 2.13(1.61,2.83) |
| Female | 242(45.4) | 291 (54.6) | 1.0(ref.) | 1.0(ref.) |
| **Nationality** |  |  |  |  |  |
| Saudi | 540 (59.8) | 363 (40.2) | **.001**  **(20.013)** | 1.82(1.40,2.38) | 1.32(0.95,1.82) |
| Non-Saudi | 133 (44.9) | 163 (55.1) | 1.0(ref.) | 1.0(ref.) |
| **Type of school** |  |  |  |  |  |
| International | 73 (60.3) | 48 (39.7) | **.001**  **(16.184)** | 1.85(1.20,2.86) | 2.31(1.41,3.78) |
| Private | 117 (45.2) | 142 (54.8) | 1.0(ref.) | 1.0(ref.) |
| Public | 483 (59.0) | 336 (41.0) | 1.74(1.32,2.31) | 1.45(1.04,2.01) |
| **Grade** |  |  |  |  |  |
| 2nd intermediate schools | 163 (57.6) | 120 (42.4) | **.024**  **(11.261)** | 1.52(1.10,2.14) | 1.61(1.10,2.38) |
| 3rd intermediate schools | 101 (61.2) | 64 (38.8) | 1.76(1.20,2.64) | 1.40(0.91,2.15) |
| 1st secondary schools | 162 (60.0) | 108 (40.0) | 1.67(1.18,2.38) | 1.46(1.00,2.15) |
| 2nd secondary schools | 135 (55.3) | 109 (44.7) | 1.38(0.97,1.98) | 1.38(0.94,2.03) |
| 3rd secondary schools | 112 (47.3) | 125 (52.7) | 1.0(ref.) | 1.0(ref.) |
| **Father education** |  |  |  |  |  |
| Secondary school/below | 268 (66.0) | 138 (34.0) | **.001**  **(24.333)** | 1.86(1.45,2.38) | 1.62(1.23,2.14) |
| University/above | 405 (51.1) | 388 (48.9) | 1.0(ref.) | 1.0(ref.) |
| **Mother education** |  |  |  |  |  |
| Secondary school/below | 325 (60.3) | 214 (39.7) | **.009**  **(6.904)** | 1.36(1.10,1.71) | 1.10(0.85,1.43) |
| University/above | 348 (52.7) | 312 (47.3) | 1.0(ref.) | 1.0(ref.) |
| **Health status** |  |  |  |  |  |
| Chronic ill | 80 (54.4) | 67 (45.6) | .656  (0.199) | 1.0(ref.) | 1.0(ref.) |
| Healthy | 593 (56.4) | 459 (43.6) | 1.08(0.76,1.53) | 0.85(0.58,1.23) |
| **Health insurance** |  |  |  |  |  |
| Have health insurance | 119 (44.4) | 149 (55.6) | **.001**  **(19.276)** | 1.0(ref.) | 1.0(ref.) |
| No health insurance/Don’t Know | 554 (59.5) | 377 (40.5) | 1.84(1.40,2.42) | 1.56(1.16,2.10) |

| **Table 5:** The association between Socio-demographic variables and the status of PHEs performance using Bi-variate and multivariate logistics regression analysis (n=1199) | | | | | |
| --- | --- | --- | --- | --- | --- |
| Items | Status of PHEs performance | | p-value  (chi-square) | Unadjusted Odds ratios (95% CI’s) | Adjusted Odds ratios  (95% CI’s) |
| Performed  (n=568) | Did not perform  (n=631) |
| n (%) | n (%) |
| **Gender** |  |  |  |  |  |
| Male | 288 (43.2) | 378 (56.8) | **.001**  (10.248) | 1.0(ref.) | 1.0(ref.) |
| Female | 280 (52.5) | 253 (47.5) | 1.45(1.15,1.83) | 1.44(1.09,1.90) |
| **Nationality** |  |  |  |  |  |
| Saudi | 414 (45.8) | 489 (54.2) | .065  (3.415) | 1.0(ref.) | 1.0(ref.) |
| Non-Saudi | 154 (52.0) | 142 (48.0) | 1.28(0.98,1.67) | 0.97(0.70,1.34) |
| **Type of School** |  |  |  |  |  |
| International | 76 (62.8) | 45 (37.2) | **.001**  (13.332) | 2.10(1.39,3.05) | 2.39(1.46,3.92) |
| Private | 123 (47.5) | 136 (52.5) | 1.10(0.83,1.46) | 1.28(0.92,1.77) |
| Public | 369 (45.1) | 450 (54.9) | 1.0(ref.) | 1.0(ref.) |
| **Grade** |  |  |  |  |  |
| 2nd intermediate schools | 108 (38.2) | 175 (61.8) | **.001**  (19.939) | 1.0(ref.) | 1.0(ref.) |
| 3rd intermediate schools | 87 (52.7) | 78 (47.3) | 1.81(1.23,2.66) | 2.08(1.37,3.17) |
| 1st secondary schools | 117 (43.3) | 153 (56.7) | 1.24(0.88,1.74) | 1.23(0.83,1.82) |
| 2nd secondary schools | 131 (53.7) | 113 (46.3) | 1.88(1.33,2.66) | 2.31(1.54,3.45) |
| 3rd secondary schools | 125 (52.7) | 112 (47.3) | 1.81(1.27,2.57) | 2.14(1.45,3.15) |
| **Father education** |  |  |  |  |  |
| Secondary school/below | 160 (39.4) | 246 (60.6) | **.001**  (15.617) | 1.0(ref.) | 1.0(ref.) |
| University/above | 408 (51.5) | 385 (48.5) | 1.63(1.28,2.08) | 1.21(0.94,1.57) |
| **Mother education** |  |  |  |  |  |
| Secondary school/below | 229 (42.5) | 310 (57.5) | **.002**  (9.379) | 1.0(ref.) | 1.0(ref.) |
| University/above | 339 (51.4) | 321 (48.6) | 1.43(1.14,1.80) | 1.32(1.0,1.73) |
| **Health status** |  |  |  |  |  |
| Chronically ill | 93 (63.3) | 54 (36.7) | **.001**  (16.973) | 2.10(1.46,2.98) | 2.06(1.41,3.01) |
| Healthy | 475 (45.2) | 577 (54.8) | 1.0(ref.) | 1.0(ref.) |
| **Health insurance** |  |  |  |  |  |
| Have | 163 (60.8) | 105 (39.2) | **.001**  (25.037) | 2.02(1.53,2.66) | 1.80(1.34,2.42) |
| Don’t have | 405 (43.5) | 526 (56.5) | 1.0(ref.) | 1.0(ref.) |

| **Table 6:** The association between the level of knowledge and the level of PHEs performance | | | |
| --- | --- | --- | --- |
| Items | **Level of Knowledge** | | P-value  (chi-square) |
| Adequate | Inadequate |
| n (%) | n (%) |
| **Status of PHE performance** | | | |
| Performed PHEs | 299 (56.8) | 269 (40) | **.001**  (33.719) |
| Didn’t perform PHEs | 227 (43.2) | 404 (60) |
| *Total (1199)* | 526 | 673 |  |
| **The levels of Recommended PHEs performance*** | | | |
| Low (0-3) | 274 (91.6) | 260 (96.7) | **.012**  (6.330) |
| High (4-6) | 25 (8.4) | 9 (3.3) |
| *Total (568)* | 299 | 269 |  |
|  |  |  |  |
| **The levels of Non-Recommended PHEs performance**** | | | |
| None (0) | 17 (5.7) | 45 (16.7) | **.001**  (35.177) |
| Low (1-3) | 180 (60.2) | 177 (65.8) |
| Moderate (4-6) | 79 (26.4) | 43 (16.0) |
| High (7-9) | 23 (7.7) | 4 (1.5) |
| Total (568) | 299 | 269 |  |
| ***: *Six Recommended PHEs for adolescents:***  1/Low: performed (0-3) of the recommended PHEs,  2/High: performed (4-6) of the recommended PHEs.  ****: *Nine Non-Recommended PHEs for adolescents:***  1/ None: performed (0) of the non-recommended PHEs,  2/ Low: performed (1-3) of the non-recommended PHEs,  3/ Moderate: performed (4-6) of the non-recommended PHEs,  4/ High: performed (7-9) of the non-recommended PHEs. | | | |
